# Supplementary material for: Minimal B Cell Extrinsic IgG Glycan Modifications of Pro- and Anti-Inflammatory IgG Preparations in vivo
Source: PubMed Central journal article supplement (PMC6970187; doi:10.3389/fimmu.2019.03024), 2020-01-09
Supplement: Data_Sheet_1.pdf [file Data_Sheet_1.pdf]

## Supplementary Material

### Figure S1

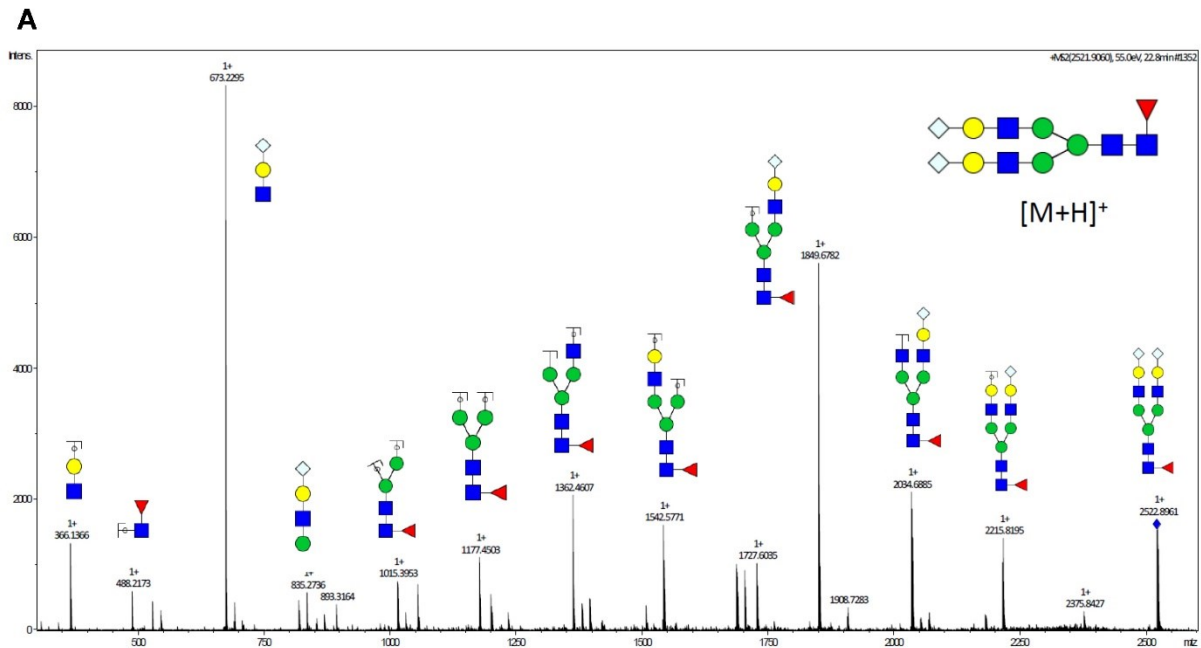

**B**

| UPLC Peak # | M       | [M+H] <sup>+</sup> | [M+2H] <sup>2+</sup> | Composition                                                                                                                                              | Proposed structure | Comment             |
|-------------|---------|--------------------|----------------------|----------------------------------------------------------------------------------------------------------------------------------------------------------|--------------------|---------------------|
| GP18        | 2067,67 | 2068,67            | 1034,8342            | (Hex) <sub>2</sub> (HexNAc) <sub>2</sub> (NeuGc) <sub>1</sub> + (Man) <sub>3</sub> (GlcNAc) <sub>2</sub>                                                 | A2G2Z1             | Major composition   |
|             | 2213,73 | 2214,73            | 1108,36              | (Hex) <sub>2</sub> (HexNAc) <sub>2</sub> (Deoxyhexose) <sub>1</sub> (NeuGc) <sub>1</sub> + (Man) <sub>3</sub> (GlcNAc) <sub>2</sub>                      | FA2G2Z1            | Minor composition   |
| GP20        | 2213,73 | 2214,73            | 1108,36              | (Hex) <sub>2</sub> (HexNAc) <sub>2</sub> (Deoxyhexose) <sub>1</sub> (NeuGc) <sub>1</sub> + (Man) <sub>3</sub> (GlcNAc) <sub>2</sub>                      | FA2G2Z1            | Major composition   |
| GP21        | 2416,87 | 2417,87            | 1209,43              | (Hex) <sub>2</sub> (HexNAc) <sub>2</sub> (NeuGc) <sub>2</sub> (Ac) <sub>1</sub> + (Man) <sub>3</sub> (GlcNAc) <sub>2</sub>                               | A2G2Z2Ac1          | Mix of compositions |
|             |         |                    |                      | (Hex) <sub>2</sub> (HexNAc) <sub>3</sub> (NeuGc) <sub>1</sub> (Deoxyhexose) <sub>1</sub> + (Man) <sub>3</sub> (GlcNAc) <sub>2</sub>                      | FA2BG2Z1           |                     |
| GP23        | 2375,87 | 2376,87            | 1188,93              | (Hex) <sub>3</sub> (HexNAc) <sub>2</sub> (Deoxyhexose) <sub>1</sub> (NeuGc) <sub>1</sub> + (Man) <sub>3</sub> (GlcNAc) <sub>2</sub>                      | FA2G3Z1            | Major composition   |
|             | 2488,91 | 2489,91            | 1245,46              | (Hex) <sub>2</sub> (HexNAc) <sub>2</sub> (Deoxyhexose) <sub>1</sub> (NeuAc) <sub>2</sub> + (Man) <sub>3</sub> (GlcNAc) <sub>2</sub>                      | FA2G2S2            | Major composition   |
| GP24        | 2520,91 | 2521,91            | 1261,45              | (Hex) <sub>2</sub> (HexNAc) <sub>2</sub> (Deoxyhexose) <sub>1</sub> (NeuGc) <sub>2</sub> + (Man) <sub>3</sub> (GlcNAc) <sub>2</sub>                      | FA2G2Z2            | Minor composition   |
|             | 2374,84 | 2375,84            | 1188,42              | (Hex) <sub>2</sub> (HexNAc) <sub>2</sub> (NeuGc) <sub>2</sub> + (Man) <sub>3</sub> (GlcNAc) <sub>2</sub>                                                 | A2G2Z2             | Major composition   |
| GP25        | 2504,91 | 2505,91            | 1253,46              | (Hex) <sub>2</sub> (HexNAc) <sub>2</sub> (Deoxyhexose) <sub>1</sub> (NeuAc) <sub>1</sub> (NeuGc) <sub>1</sub> + (Man) <sub>3</sub> (GlcNAc) <sub>2</sub> | A2G2Z1S1           | Major composition   |
| GP25        | 2374,84 | 2375,84            | 1188,42              | (Hex) <sub>2</sub> (HexNAc) <sub>2</sub> (NeuGc) <sub>2</sub> + (Man) <sub>3</sub> (GlcNAc) <sub>2</sub>                                                 | A2G2Z2             | Major composition   |
|             | 2520,91 | 2521,91            | 1261,45              | (Hex) <sub>2</sub> (HexNAc) <sub>2</sub> (Deoxyhexose) <sub>1</sub> (NeuGc) <sub>2</sub> + (Man) <sub>3</sub> (GlcNAc) <sub>2</sub>                      | FA2G2Z2            | Minor composition   |
| GP26        | 2520,91 | 2521,91            | 1261,45              | (Hex) <sub>2</sub> (HexNAc) <sub>2</sub> (Deoxyhexose) <sub>1</sub> (NeuGc) <sub>2</sub> + (Man) <sub>3</sub> (GlcNAc) <sub>2</sub>                      | FA2G2Z2            | Major composition   |

**Figure S1: Confirmation of sialylated glycopeak structures by LC-MS**

The structures of the indicated glycopeaks (GP) were confirmed by LC-MS (more precisely, by HILIC-UPLC-ESI-QTOF-MS/MS). (A) An exemplary fragmentation spectrum of GP26 (FA2G2Z2) is shown including an assignment of schematic drawings of the sugar structures for the major peaks (A). (B) Table summarizing the mass spectrometric analysis of GPs corresponding to sialylated glycan structures (GP18, 20, 21, and GP23-26). Calculated mass and  $m/z$ -ratios of singly ( $[M+H]^+$ ) and doubly charged ( $[M+2H]^{2+}$ ) glycan species, composition, proposed structure and respective comments are listed for each GP. Structure abbreviations: F, a core fucose  $\alpha$ 1–6 linked to the inner N-acetylglucosamine (GlcNAc); Ax, number of antenna (GlcNAc); B, bisecting GlcNAc linked  $\beta$ 1–4 to mannose; Gx, number of  $\beta$ 1–4 linked galactose (G) on antenna;  $\alpha$ Gx, number of  $\alpha$ 1–3 linked galactose linked to  $\beta$ 1–4 galactose; Sx, number of N-acetylneuraminic acids (S) linked to  $\beta$ 1–4 galactose; Zx, number of N-glycolylneuraminic acids (Z) linked to  $\beta$ 1–4 galactose; Ac, O-Acetylation.

Figure S2

A

| Peak | Annotation                  |                               | Structure |       |
|------|-----------------------------|-------------------------------|-----------|-------|
|      | human                       | mouse                         | human     | mouse |
| 1    | FA1                         | FA1                           |           |       |
| 2    | A2                          | n.d.                          |           |       |
| 3    | A2B                         | n.d.                          |           |       |
| 4    | FA2                         | FA2                           |           |       |
| 5    | Man5                        | n.d.                          |           |       |
| 6    | FA2B<br>A2G1[6]             | FA2B                          |           |       |
| 7    | A2G1[3]                     | n.d.                          |           |       |
| 8    | FA2G1[6]<br>A2BG1           | FA2G1[6]                      |           |       |
| 9    | FA2G1[3]                    | FA2G1[3]                      |           |       |
| 10   | FA2BG1[6]                   | FA2BG1[6]                     |           |       |
| 11   | FA2BG1[3]                   | n.d.                          |           |       |
| 12   | A2G2                        | n.d.                          |           |       |
| 13   | A2BG2                       | n.d.                          |           |       |
| 14   | FA2G2                       | FA2G2                         |           |       |
| 15   | FA2BG2<br>FA1G1S1<br>A2G1S1 | n.d.                          |           |       |
| 16   | FA2G1[6]S1<br>FA2G1[3]S1    | n.d.                          |           |       |
| 17a  | A2G2S1                      | FA2G1[6]Z1                    |           |       |
| 17b  |                             | FA2G1[3]Z1                    |           |       |
| 18   | A2BG2S1<br>FA2G2S1          | A2G2Z1<br>FA2G2Z1             |           |       |
| 19   | FA2BG2S1                    | n.d.                          |           |       |
| 20   | n.d.                        | FA2G2Z1                       |           |       |
| 21   | A2G2S2                      | A2G2Z2Ac1<br>FA2BG2Z1         |           |       |
| 22   | A2BG2S2                     | n.d.                          |           |       |
| 23   | FA2G2S2                     | FA2G2aG1Z1                    |           |       |
| 24   | FA2BG2                      | FA2G2Z2<br>A2G2Z2             |           |       |
| 25   | x                           | A2G2Z1S1<br>FA2G2Z2<br>A2G2Z2 |           |       |
| 26   | x                           | FA2G2Z2                       |           |       |

B

| Peak | Annotation           | Structure |
|------|----------------------|-----------|
| 1    | A2G2S2(2,6)          |           |
| 2    | A2G2Z2(2,6)          |           |
| 3    | FA2G2S2(2,6)         |           |
| 4    | FA2G2Z2(2,6)         |           |
| 5    | FA2BG2S2(2,6)        |           |
| 6    | A2G1S1(2,6)[6]       |           |
| 7    | FA2G1S1(2,6)[6]      |           |
| 8    | FA2G1S1(2,6)[3]      |           |
| 9    | A2G2S1(2,6)[6]       |           |
| 10   | A2G2S1(2,6)[3]       |           |
| 11   | A2G2Z1(2,6)          |           |
| 12   | FA2G2S1(2,6)<br>Man5 |           |
| 13   | FA2G2Z1(2,6)         |           |
| 14   | FA2BG2S1<br>A2       |           |
| 15   | A2B                  |           |
| 16   | FA2                  |           |
| 17   | A2G1[6]              |           |
| 18   | A2G1[3]              |           |
| 19   | FA2B                 |           |
| 20   | FA2G1[6]             |           |
| 21   | FA2G1[3]             |           |
| 22   | FA2BG1[6]<br>A2G2    |           |
| 23   | FA2BG1[3]            |           |
| 24   | A2BG2                |           |
| 25   | FA2G2                |           |
| 26   | FA2BG2               |           |
| 27   | FA2G2aG1[6]          |           |
| 28   | FA2G2aG1[3]          |           |
| 29   | FA2G2aG2             |           |

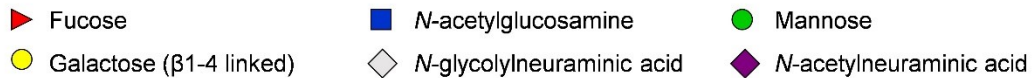

**Figure S2: Nomenclature, annotation and structure of different glycan peaks**

Depicted are the annotations and structures of each glycopeak obtained by HILIC-UPLC-FLR (A) and xCGE-LIF (B) analysis. For HILIC-UPLC-FLR annotation and structure is discriminated between human and mouse IgG glycoforms. Schematic drawings of the sugar structures for the respective peaks are depicted. The Figure legend at the bottom of the Figure depicts the symbols used for individual sugar residues. Structure abbreviations: F, a core fucose  $\alpha$ 1–6 linked to the inner N-acetylglucosamine (GlcNAc); Ax, number of antenna (GlcNAc); B, bisecting GlcNAc linked  $\beta$ 1–4 to mannose; Gx, number of  $\beta$ 1–4 linked galactose (G) on antenna; G1[3] and G1[6] indicates that the galactose is on the antenna of the  $\alpha$ 1–3 or  $\alpha$ 1–6 mannose;  $\alpha$ Gx, number of  $\alpha$ 1-3 linked galactose linked to  $\beta$ 1–4 galactose; Sx, number of N-acetylneuraminic acids (S) linked to  $\beta$ 1–4 galactose; Zx, number of N-glycolylneuraminic acids (Z) linked to  $\beta$ 1–4 galactose; Ac, O-Acetylation.

**Figure S3**

**A**

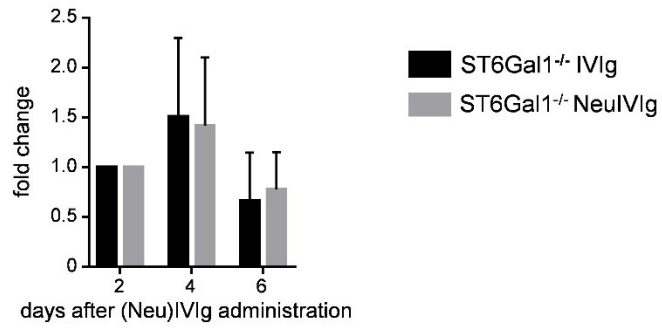

**B**

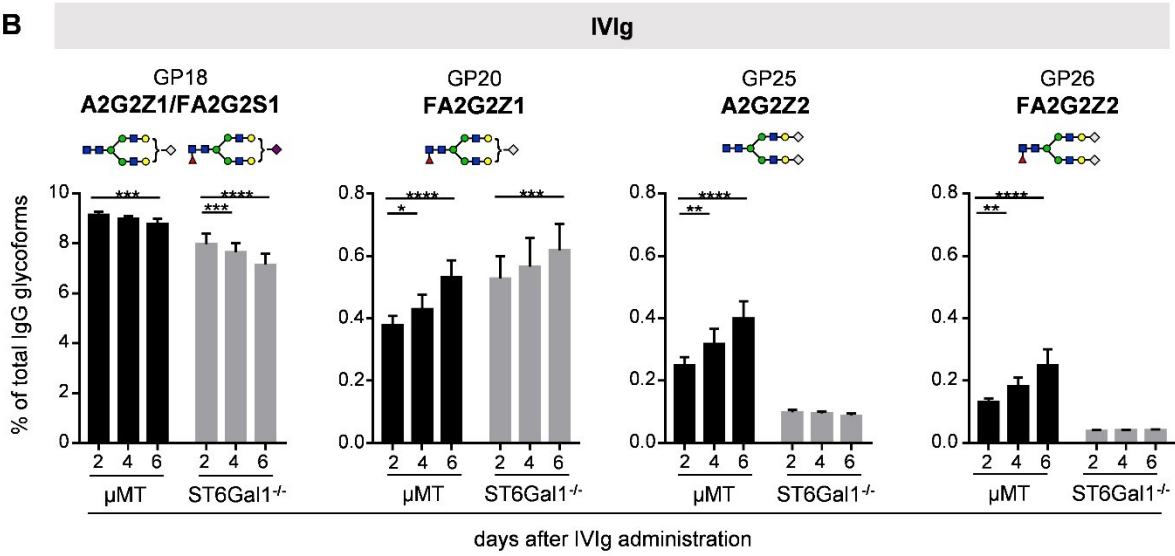

**C**

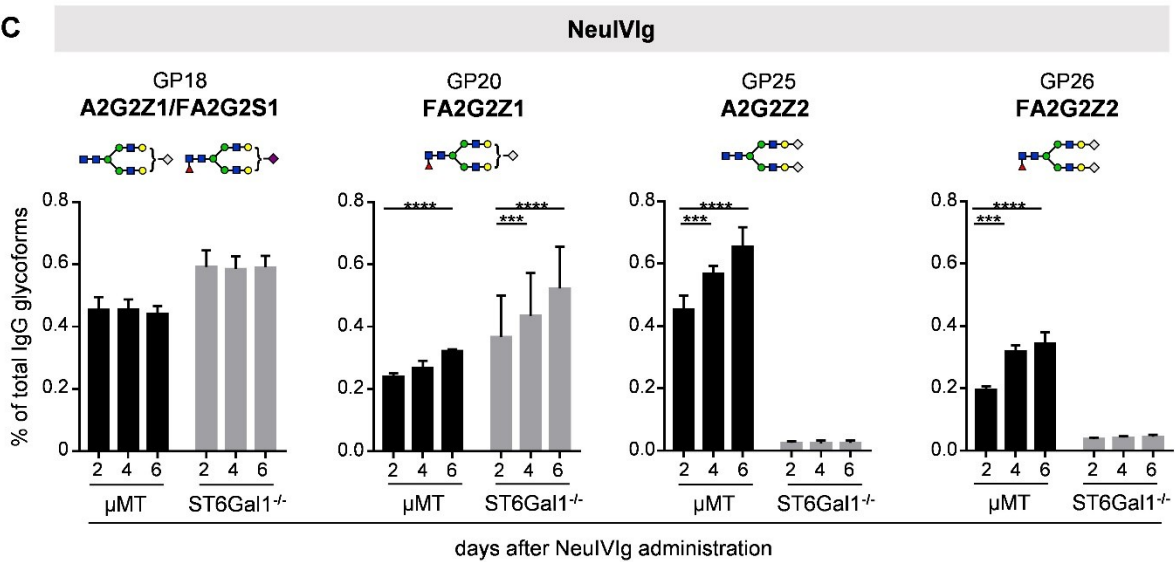

**Figure S3: IVIg antibody half-life and kinetics of appearance of de novo sialylated IgG glycoforms as obtained by HILIC-UPLC-FLR**

(A) Depicted is the fold change of human IgG concentrations in the sera of IVIg or neuraminidase treated IVIg (NeuIVIg) injected ST6Gal1<sup>-/-</sup> mice at the indicated time points. (B, C) Shown are the relative changes (% of total IgG glycoforms in the preparation) in glycopeaks (GP) 18, 20, 25 and 26 of IVIg (B) or neuraminidase treated IVIg (C) two, four, and six days after injection into  $\mu$ MT and ST6Gal1 deficient mice by HILIC-UPLC-FLR analysis. Bars represent mean  $\pm$  SD. \*p=0.05, \*\*p=0.01. \*\*\*p=0.001, \*\*\*\*p=0.0001 by repeated measures two-way ANOVA. n=4-5. In each Figure, a schematic drawing of the sugar structure for the respective glycopeak is depicted.

**Figure S4**

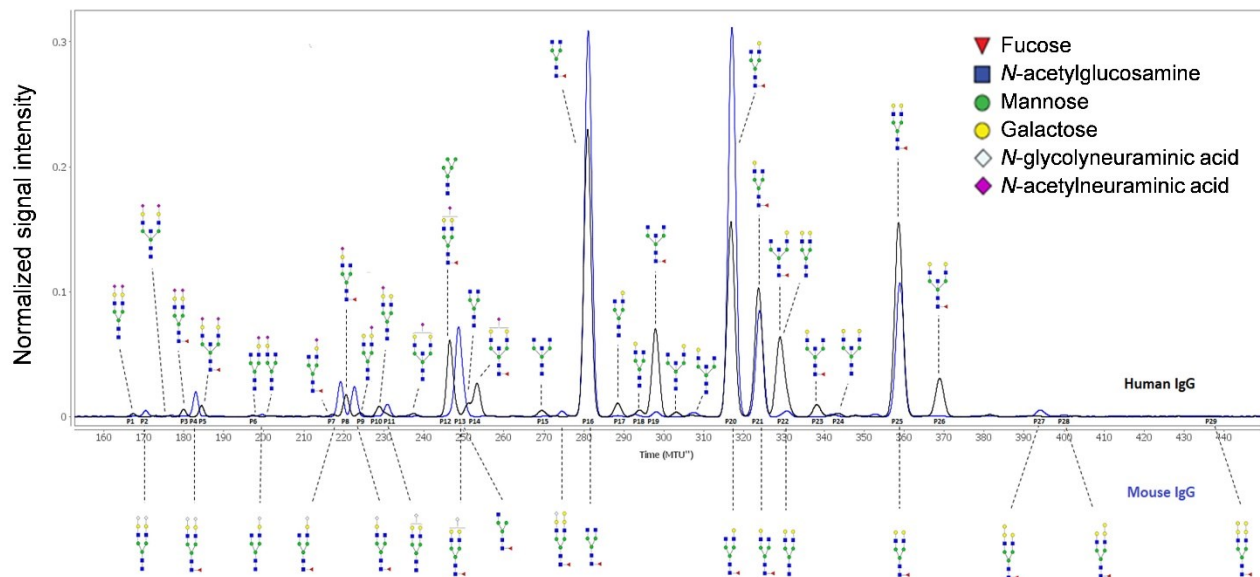

**Figure S4: Representative murine and human IgG glycan profile detected with xCGE-LIF analysis**

Shown are representative chromatograms of murine (blue) and human (black) IgG glycan profiles obtained by xCGE-LIF analysis. Schematic drawing of the sugar structure for each individual glycopeak (P1 – P29) is depicted (human structures on top, mouse structures on the bottom). The Figure legend at the upper right of the Figure depicts the symbols used for individual sugar residues.

Figure S5

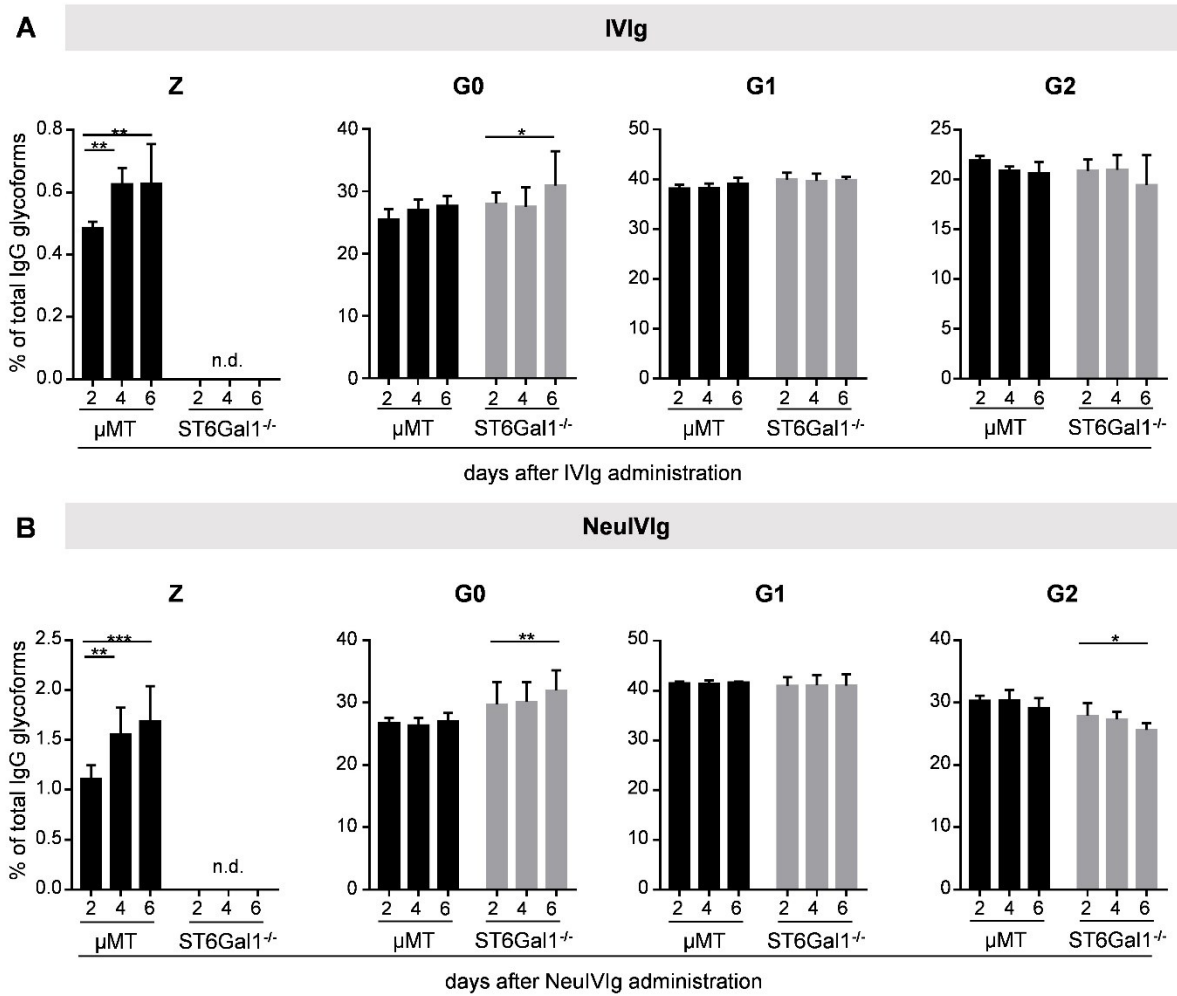

**Figure S5: Kinetics of different IgG glycoforms as obtained by xCGE-LIF analysis.**

(A, B) Shown are the relative changes (% of total IgG glycoforms in the preparation) of the sialylated (Z), agalactosylated (G0), monogalactosylated (G1) and digalactosylated (G2) glycoforms of IVIg (A) or neuraminidase treated IVIg (B) two, four, and six days after injection into  $\mu$ MT and ST6Gal1 deficient mice by xCGE-LIF analysis. Bars represent mean  $\pm$  SD. \* $p=0.05$ , \*\* $p=0.01$ , \*\*\* $p=0.001$ , by repeated measures two-way ANOVA.  $n=4-5$ . n.d.: not detectable.

Figure S6

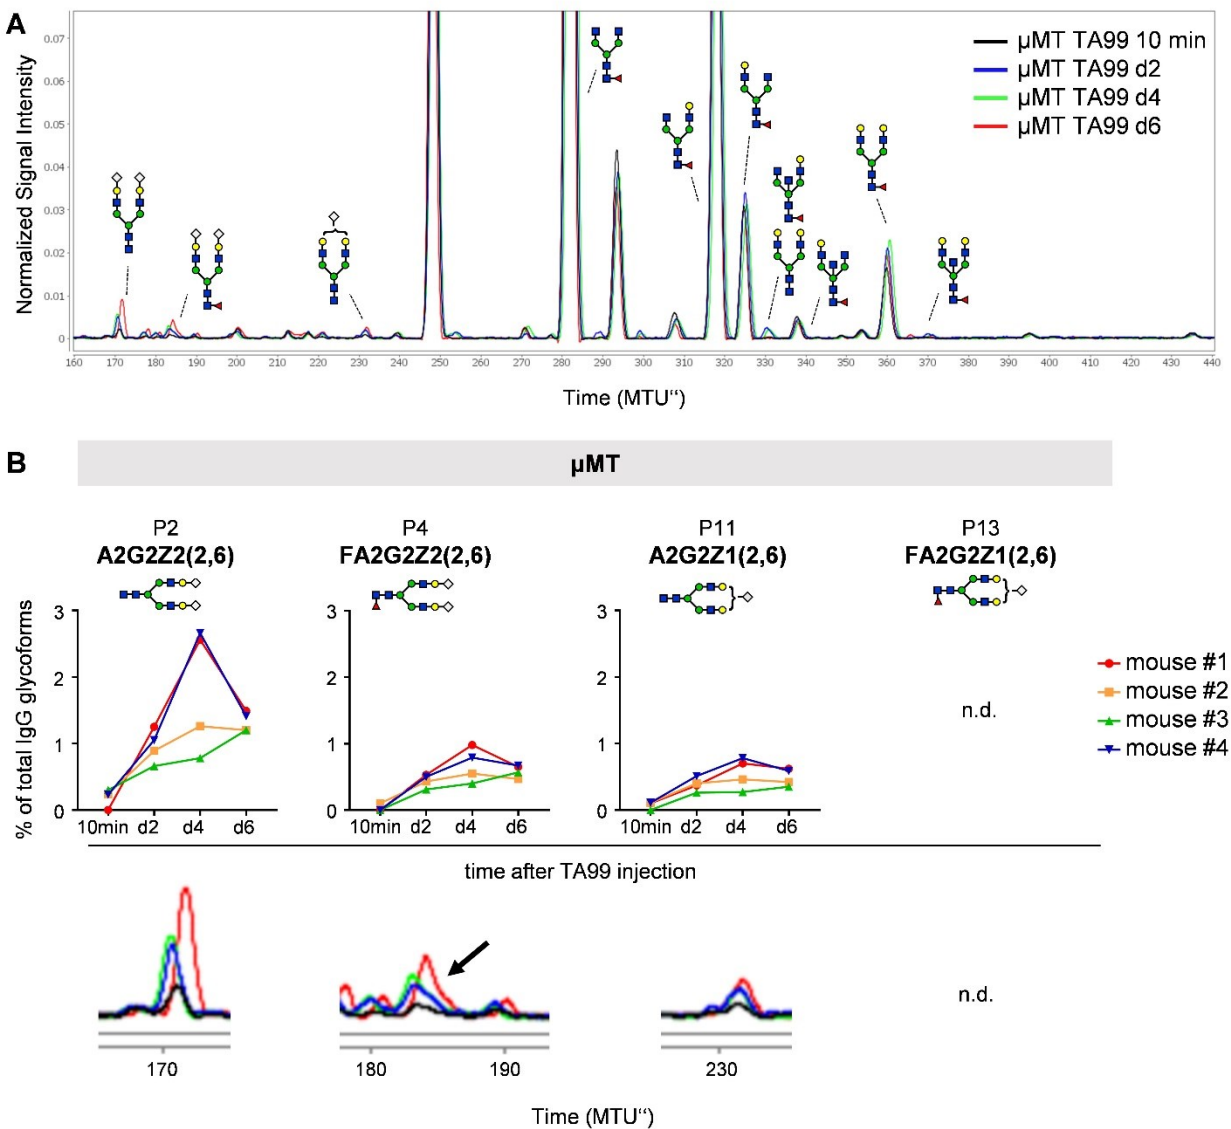

**Figure S6: Kinetics of appearance of de novo sialylated IgG glycoforms on murine IgG.**

(A) Shown is a representative overlay of xCGE-LIF IgG glycoanalysis of TA99 ten minutes as well as two, four and six days after injection into  $\mu$ MT mice ( $\mu$ MT TA99 10 min/d2/d4/d6). Clearly identifiable glycan peaks are annotated with their respective schematic drawing of the sugar structure. (B) Shown are the relative changes (% of total IgG glycoforms in the preparation) in glycopeaks (P) 2, 4 and 11 of TA99 ten minutes as well as two, four, and six days after injection into  $\mu$ MT mice by xCGE-LIF analysis for individual mice ( $n=4$ ). In the bottom of each Figure a representative xCGE-LIF trace of glycopeaks P2, 4 and 11 is depicted (colors of individual traces correspond to Fig. S6A). P13 was not clearly identifiable and therefore was not determined (n.d.). In each Figure a schematic drawing of the sugar structure for the respective glycopeak is shown. Abbreviations: MTU'': normalized migration time units.
